# Supplementary material for: The Long Non-coding RNA LINC01133 Promotes Hepatocellular Carcinoma Progression by Sponging miR-199a-5p and Activating Annexin A2
Source: Research Square preprint supplement (doi:10.21203/rs.3.rs-130867/v1), 2020-12-22
Supplement: Supplementary file 1 [file 5dcbe326d8a48d0741f9b670.docx]

**Supplementary Figure legends**

**Supplementary Figure 1. Identification of the LINC01133 with CNVs involved in HCC recurrence and prognosis. (A)** The flow chart for selecting candidate lincRNAs in HCC is shown. LINC01133 was identified for further study. **(B)** qRT-PCR was performed to determine the expression levels of LINC00051, LINC00303, LINC00482, LINC00862, LINC01136 and LINC01300 in 70 pairs of HCC samples and adjacent non-tumor tissue samples. 18S rRNA was used as an internal reference. **(C)** The CNV of seven candidate lincRNAs in 238 paired tissue samples was determined by TaqMan copy number assay. RNase P was used as an internal reference. **(D)** Kaplan-Meier analyses of overall survival based on CNVs in LINC00051, LINC00303, LINC00482, LINC00862, LINC01136 and LINC01300 in 238 patients (cohort 2). Data are shown as the mean ± standard deviation.

**Supplementary Figure 2. The role of LINC01133 in HCC. (A)** The genomic localization (<https://www.ncbi.nlm.nih.gov/gene/>) and transcripts of LINC01133 (<http://asia.ensembl.org/>). **(B)** The sequences of miR-199a-5p and its potential binding sites at the 3’UTR of SNAI1. The nucleotides mutated in the SNAI1-3’UTR mutant are shown in red. Luciferase assays were conducted to examine the miR-199a-5p–SNAI1 interactions. **(C)** The potential ANXA2-binding site on LINC01133 in the secondary structure diagram was predicted by RNAfold web server (<http://rna.tbi.univie.ac.at/cgi-bin/RNAWebSuite/RNAfold.cgi>). **(D)** The potential ANXA2-binding site on LINC01133 was predicted using catRAPI omics (<http://service.tartaglialab.com/page/catrapid_omics_group>).
